# Supplementary material
Source: Springer Nature journal article supplement (https://www.springermedizin.de/resource/supplementary/12879_2011_2071_MOESM1_ESM.pdf/9443634)

(a)

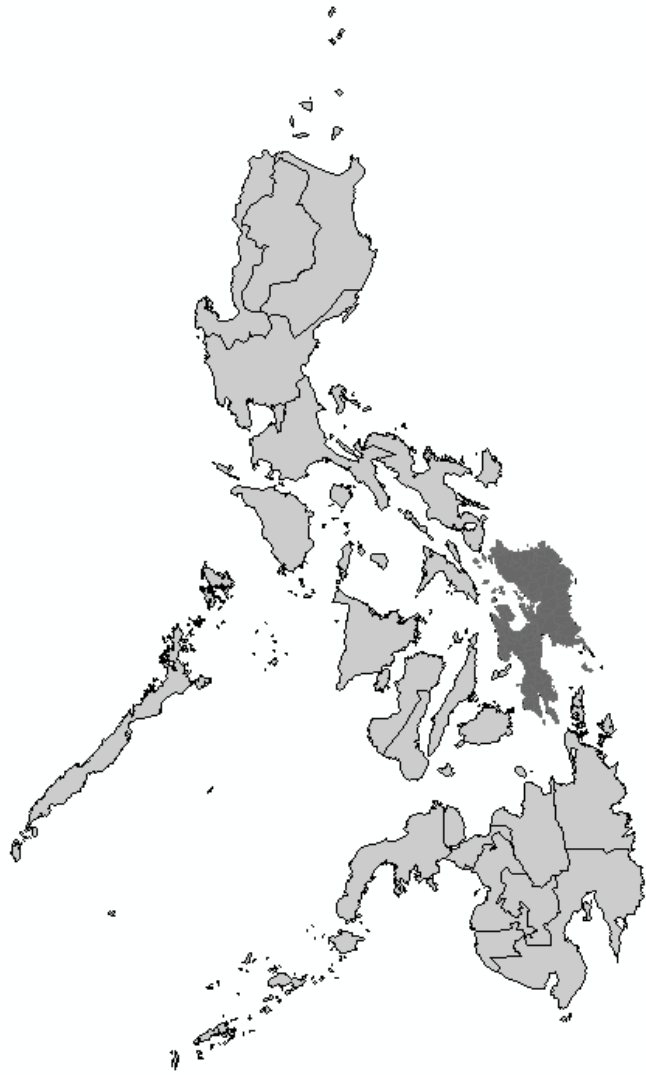

(b)

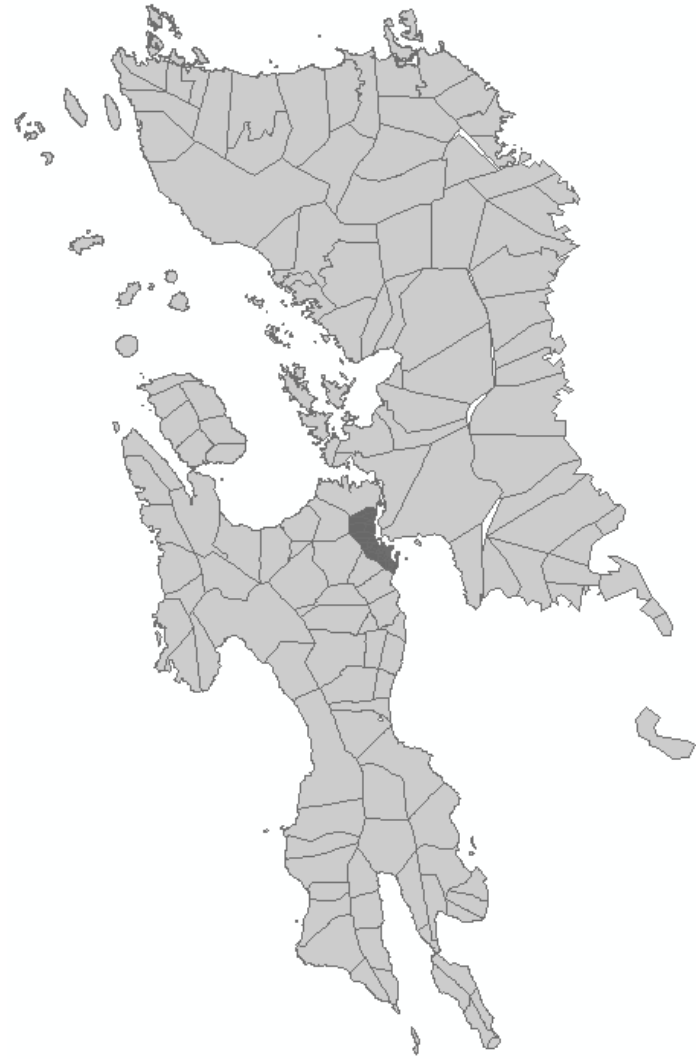

Supplement: MOESM1 [file 9443634]
